# Supplementary material for: Preparation and characterization of long chain branched polycarbonates with significantly enhanced environmental stress cracking behavior through gamma radiation with addition of difunctional monomer
Source: Royal Society of Chemistry journal article supplement (doi:10.1039/c6py00289g), 2016-01-01
Supplement: c6py00289g1.pdf [file c6py00289g1.pdf]

Supplementary Information for

**Preparation and characterization of long chain branched polycarbonates with significantly enhanced environmental stress cracking behavior through gamma radiation with addition of difunctional monomer†**

*Xiaohang Han, Yangguang Hu, Miao Tang, Huagao Fang, Qianghua Wu and  
Zhigang Wang\**

*CAS Key Laboratory of Soft Matter Chemistry, Department of Polymer Science and Engineering, Hefei National Laboratory for Physical Sciences at the Microscale, University of Science and Technology of China, Hefei, Anhui Province 230026 China*

*Correspondence to Z.G.W. Email: zgwang2@ustc.edu.cn*

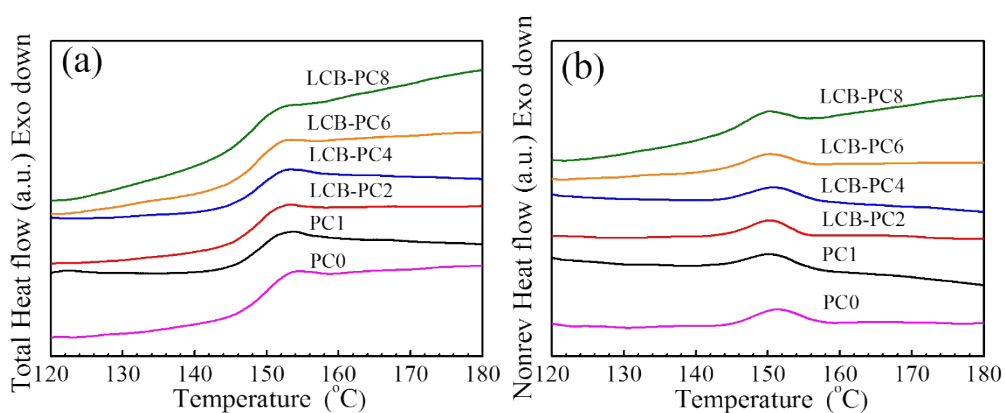

**Fig. S1** (a) Total heat flow curves and (b) nonreversible heat flow curves for linear PCs and LCB-PCs without thermal annealing. MDSC heating rate is 5 °C/min with a

modulation amplitude of 0.5 °C in a period of 50 s. The curves are vertically shifted for clarity.

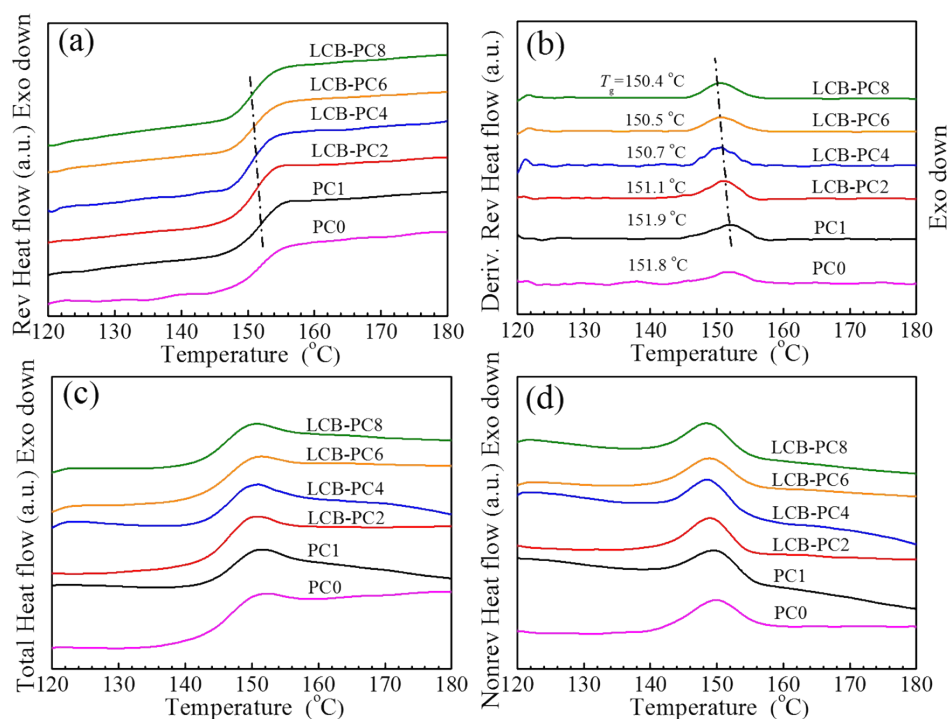

**Fig. S2** (a) Reversible heat flow curves, (b) derivative reversible heat flow curves, (c) total heat flow curves and (d) nonreversible heat flow curves for linear PCs and LCB-PCs with the annealing time of 6 h. MDSC heating rate is 5 °C/min with a modulation amplitude of 0.5 °C in a period of 50 s. The curves are vertically shifted for clarity.

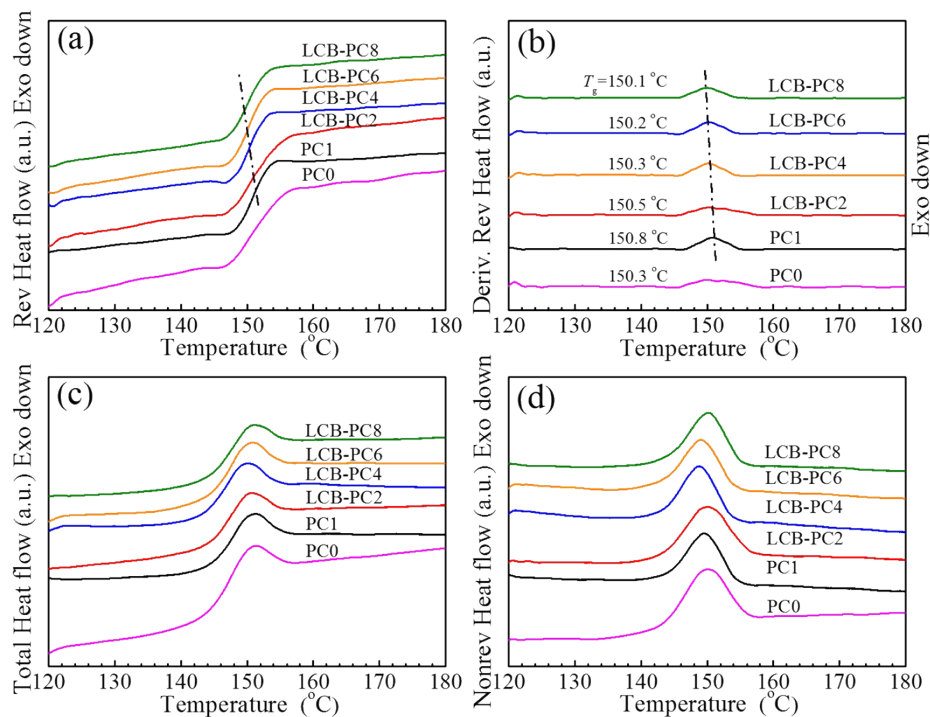

**Fig. S3** (a) Reversible heat flow curves, (b) derivative reversible heat flow curves, (c) total heat flow curves and (d) nonreversible heat flow curves for linear PCs and LCB-PCs with the annealing time of 12 h. MDSC heating rate is 5 °C/min with a modulation amplitude of 0.5 °C in a period of 50 s. The curves are vertically shifted for clarity.

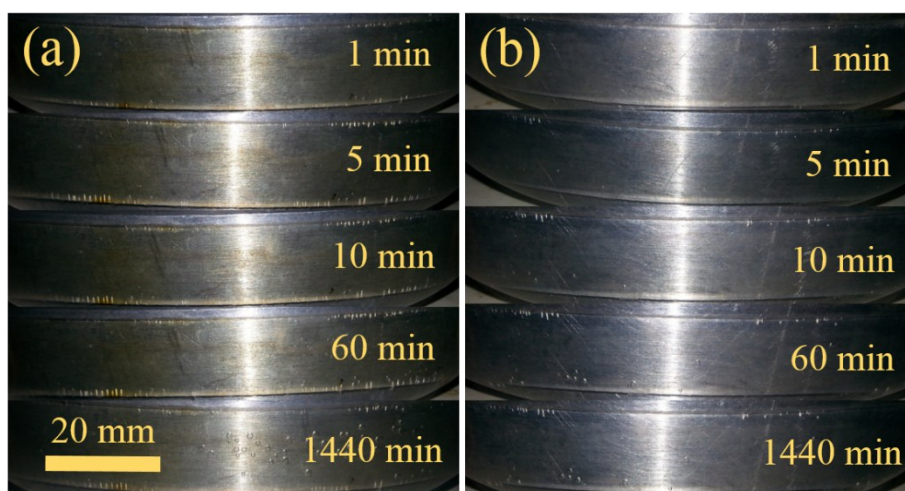

**Fig. S4** Developments of crack with time for (a) PC1 and (b) LCB-PC4 at the applied strain of 0.015.
